# Supplementary material
Source: PubMed Central journal article supplement (PMC3879018)
Supplement: NIHMS531569-supplement-01.pdf [file NIHMS531569-supplement-01.pdf]

**Supplemental Table 1:** Zancolli-Lasso maximal fingertip-to-palm distances by MCP pre-flexion

| MCP Pre-flexion | Finger |        |        |        |
|-----------------|--------|--------|--------|--------|
|                 | Index  | Middle | Ring   | Small  |
| 0°              | 65 ± 6 | 70 ± 4 | 64 ± 5 | 47 ± 5 |
| 20°             | 67 ± 6 | 71 ± 4 | 70 ± 2 | 51 ± 4 |
| 60°             | 76 ± 5 | 82 ± 3 | 80 ± 2 | 63 ± 1 |
| 80°             | 80 ± 5 | 85 ± 2 | 83 ± 2 | 64 ± 1 |

Maximal fingertip-to-palm distance of Zancolli-Lasso hands at each finger with varying degrees of pre-flexion at the MCP joint. Distances expressed as mean over all hands ± SEM, mm.
